# Supplementary material for: Ruthenium(ii)-supported phosphovanadomolybdates [Ru(dmso)3PMo6V3O32]6− and [Ru(PMo6V3O32)2]14−, and their use as heterogeneous catalysts for oxidation of alcohols
Source: Royal Society of Chemistry journal article supplement (doi:10.1039/d0nj05752e), 2020-12-10
Supplement: d0nj05752e1.pdf [file d0nj05752e1.pdf]

## Supplementary Materials

**Table S1.** Crystallographic data and experimental details for ruthenium(II)-supported phosphovanadomolybdates [Ru(dms<sub>o</sub>)<sub>3</sub>PMo<sub>6</sub>V<sub>3</sub>O<sub>32</sub>]<sup>6-</sup> (**1**) and [Ru(PMo<sub>6</sub>V<sub>3</sub>O<sub>32</sub>)<sub>2</sub>]<sup>14-</sup> (**2**).

| Complex                                                                       | <b>1</b>                                                                                                                        | <b>2</b>                                                                                        |
|-------------------------------------------------------------------------------|---------------------------------------------------------------------------------------------------------------------------------|-------------------------------------------------------------------------------------------------|
| Empirical formula                                                             | C <sub>6</sub> H <sub>18</sub> CS <sub>3</sub> Mo <sub>6</sub> Na <sub>3</sub> O <sub>40</sub> PRuS <sub>3</sub> V <sub>3</sub> | C <sub>8</sub> Mo <sub>12</sub> Na <sub>6</sub> O <sub>67</sub> P <sub>2</sub> RuV <sub>6</sub> |
| Formula weight                                                                | 2154.58                                                                                                                         | 3893.15                                                                                         |
| Crystal system                                                                | orthorhombic                                                                                                                    | monoclinic                                                                                      |
| Space group                                                                   | <i>Pna2</i> <sub>1</sub>                                                                                                        | <i>P2</i> <sub>1</sub> / <i>n</i>                                                               |
| <i>a</i> , Å                                                                  | 20.2810(16)                                                                                                                     | 13.4946(18)                                                                                     |
| <i>b</i> , Å                                                                  | 19.8627(15)                                                                                                                     | 19.450(3)                                                                                       |
| <i>c</i> , Å                                                                  | 13.2758(10)                                                                                                                     | 17.180(2)                                                                                       |
| <i>β</i> , deg                                                                |                                                                                                                                 | 105.833(3)                                                                                      |
| <i>V</i> , Å <sup>3</sup>                                                     | 5348.0(7)                                                                                                                       | 4338.0(10)                                                                                      |
| <i>Z</i>                                                                      | 4                                                                                                                               | 2                                                                                               |
| <i>D</i> <sub>calc</sub> , g cm <sup>-3</sup>                                 | 2.676                                                                                                                           | 2.980                                                                                           |
| Temperature, K                                                                | 296(2)                                                                                                                          | 296(2)                                                                                          |
| <i>F</i> (000), <i>e</i>                                                      | 4000                                                                                                                            | 3516                                                                                            |
| <i>μ</i> (Mo <i>Kα</i> ), mm <sup>-1</sup>                                    | 4.406                                                                                                                           | 5.919                                                                                           |
| Total refln                                                                   | 28719                                                                                                                           | 23453                                                                                           |
| Independent refln                                                             | 9354                                                                                                                            | 7544                                                                                            |
| <i>R</i> <sub>int</sub>                                                       | 0.0216                                                                                                                          | 0.0391                                                                                          |
| Ref. parameters                                                               | 596                                                                                                                             | 476                                                                                             |
| <i>R1</i> <sup>a</sup> / <i>wR2</i> <sup>b</sup> ( <i>I</i> > 2σ( <i>I</i> )) | 0.0526 / 0.1354                                                                                                                 | 0.0823 / 0.1893                                                                                 |
| <i>R1</i> / <i>wR2</i> (all data)                                             | 0.0539 / 0.1359                                                                                                                 | 0.0969 / 0.1946                                                                                 |
| GoF <sup>c</sup>                                                              | 1.154                                                                                                                           | 1.214                                                                                           |

<sup>a</sup>  $R1 = \frac{\sum ||F_o| - |F_c||}{\sum |F_o|}$ ; <sup>b</sup>  $wR2 = \frac{[\sum w(F_o^2 - F_c^2)^2 / \sum w(F_o^2)^2]^{1/2}}$ ,  $w = [\sigma^2(F_o^2) + (AP)^2 + BP]^{-1}$ , where  $P = \frac{(\text{Max}(F_o^2, 0) + 2F_c^2)}{3}$  and A and B are constants adjusted by the program; <sup>c</sup>  $\text{GoF} = S = \frac{[\sum w(F_o^2 - F_c^2)^2 / (n_{\text{obs}} - n_{\text{param}})]^{1/2}}$ , where  $n_{\text{obs}}$  is the number of data and  $n_{\text{param}}$  the number of refined parameters.

**Table S2.** Selected bond lengths [Å] and angles [°] for cluster **1**.

|                 |           |                   |           |
|-----------------|-----------|-------------------|-----------|
| Ru(1)-O(6)      | 2.045(7)  | Mo(4)-O(20)       | 2.203(8)  |
| Ru(1)-O(4)      | 2.068(7)  | Mo(4)-O(21)       | 2.243(7)  |
| Ru(1)-O(5)      | 2.083(7)  | Mo(5)-O(31)       | 1.713(9)  |
| Ru(1)-S(2)      | 2.240(3)  | Mo(5)-O(32)       | 1.720(9)  |
| Ru(1)-S(1)      | 2.263(3)  | Mo(5)-O(26)       | 1.868(8)  |
| Ru(1)-S(3)      | 2.266(3)  | Mo(5)-O(33)       | 1.930(8)  |
| Mo(1)-O(15)     | 1.706(10) | Mo(5)-O(28)       | 2.252(8)  |
| Mo(1)-O(16)     | 1.756(11) | Mo(5)-O(27)       | 2.385(8)  |
| Mo(1)-O(10)     | 1.903(7)  | Mo(6)-O(34)       | 1.706(9)  |
| Mo(1)-O(26)     | 1.951(8)  | Mo(6)-O(35)       | 1.739(10) |
| Mo(1)-O(17)     | 2.203(8)  | Mo(6)-O(30)       | 1.857(8)  |
| Mo(1)-O(18)     | 2.235(8)  | Mo(6)-O(33)       | 1.932(8)  |
| Mo(2)-O(25)     | 1.716(8)  | Mo(6)-O(28)       | 2.254(8)  |
| Mo(2)-O(27)     | 1.732(7)  | Mo(6)-O(29)       | 2.412(8)  |
| Mo(2)-O(17)     | 1.885(8)  | V(1)-O(7)         | 1.621(7)  |
| Mo(2)-O(24)     | 1.933(8)  | V(1)-O(4)         | 1.682(7)  |
| Mo(2)-O(11)     | 2.194(7)  | V(1)-O(10)        | 1.904(8)  |
| Mo(2)-O(19)     | 2.292(7)  | V(1)-O(11)        | 1.990(8)  |
| Mo(3)-O(23)     | 1.706(8)  | V(1)-O(17)        | 1.996(7)  |
| Mo(3)-O(29)     | 1.743(7)  | V(2)-O(8)         | 1.614(8)  |
| Mo(3)-O(21)     | 1.896(7)  | V(2)-O(5)         | 1.699(7)  |
| Mo(3)-O(24)     | 1.941(8)  | V(2)-O(11)        | 1.808(7)  |
| Mo(3)-O(12)     | 2.184(7)  | V(2)-O(12)        | 1.812(7)  |
| Mo(3)-O(19)     | 2.307(7)  | V(3)-O(9)         | 1.621(8)  |
| Mo(4)-O(14)     | 1.707(9)  | V(3)-O(6)         | 1.678(7)  |
| Mo(4)-O(22)     | 1.718(9)  | V(3)-O(13)        | 1.881(8)  |
| Mo(4)-O(13)     | 1.909(7)  | V(3)-O(21)        | 1.987(7)  |
| Mo(4)-O(30)     | 1.961(8)  | V(3)-O(12)        | 1.996(8)  |
| O(6)-Ru(1)-O(4) | 87.9(3)   | O(22)-Mo(4)-O(21) | 166.1(4)  |
| O(6)-Ru(1)-O(5) | 84.9(3)   | O(13)-Mo(4)-O(21) | 72.5(3)   |
| O(4)-Ru(1)-O(5) | 86.4(3)   | O(30)-Mo(4)-O(21) | 81.5(3)   |
| O(6)-Ru(1)-S(2) | 88.3(2)   | O(20)-Mo(4)-O(21) | 80.2(3)   |
| O(4)-Ru(1)-S(2) | 91.5(2)   | O(14)-Mo(4)-V(3)  | 100.7(3)  |
| O(5)-Ru(1)-S(2) | 172.9(2)  | O(22)-Mo(4)-V(3)  | 132.0(3)  |
| O(6)-Ru(1)-S(1) | 178.3(2)  | O(13)-Mo(4)-V(3)  | 33.8(2)   |
| O(4)-Ru(1)-S(1) | 90.4(2)   | O(30)-Mo(4)-V(3)  | 117.7(2)  |
| O(5)-Ru(1)-S(1) | 94.7(2)   | O(20)-Mo(4)-V(3)  | 73.7(2)   |
| S(2)-Ru(1)-S(1) | 92.01(10) | O(21)-Mo(4)-V(3)  | 39.02(19) |
| O(6)-Ru(1)-S(3) | 90.7(2)   | O(31)-Mo(5)-O(32) | 103.5(5)  |
| O(4)-Ru(1)-S(3) | 174.1(2)  | O(31)-Mo(5)-O(26) | 102.4(4)  |
| O(5)-Ru(1)-S(3) | 87.7(2)   | O(32)-Mo(5)-O(26) | 99.9(4)   |
| S(2)-Ru(1)-S(3) | 94.24(10) | O(31)-Mo(5)-O(33) | 96.9(4)   |

---

|                   |           |                   |          |
|-------------------|-----------|-------------------|----------|
| S(1)-Ru(1)-S(3)   | 90.94(9)  | O(32)-Mo(5)-O(33) | 98.3(4)  |
| O(15)-Mo(1)-O(16) | 101.8(6)  | O(26)-Mo(5)-O(33) | 149.5(3) |
| O(15)-Mo(1)-O(10) | 98.6(4)   | O(31)-Mo(5)-O(28) | 163.4(4) |
| O(16)-Mo(1)-O(10) | 100.5(4)  | O(32)-Mo(5)-O(28) | 90.2(4)  |
| O(15)-Mo(1)-O(26) | 101.4(4)  | O(26)-Mo(5)-O(28) | 84.2(3)  |
| O(16)-Mo(1)-O(26) | 95.4(5)   | O(33)-Mo(5)-O(28) | 71.5(3)  |
| O(10)-Mo(1)-O(26) | 151.3(3)  | O(31)-Mo(5)-O(27) | 85.3(4)  |
| O(15)-Mo(1)-O(17) | 164.3(5)  | O(32)-Mo(5)-O(27) | 171.2(4) |
| O(16)-Mo(1)-O(17) | 93.0(5)   | O(26)-Mo(5)-O(27) | 77.2(3)  |
| O(10)-Mo(1)-O(17) | 73.1(3)   | O(33)-Mo(5)-O(27) | 81.1(3)  |
| O(26)-Mo(1)-O(17) | 82.4(3)   | O(28)-Mo(5)-O(27) | 81.3(3)  |
| O(15)-Mo(1)-O(18) | 87.1(5)   | O(34)-Mo(6)-O(35) | 102.5(5) |
| O(16)-Mo(1)-O(18) | 170.7(5)  | O(34)-Mo(6)-O(30) | 100.1(4) |
| O(10)-Mo(1)-O(18) | 81.0(3)   | O(35)-Mo(6)-O(30) | 102.3(5) |
| O(26)-Mo(1)-O(18) | 79.7(3)   | O(34)-Mo(6)-O(33) | 99.1(4)  |
| O(17)-Mo(1)-O(18) | 78.6(3)   | O(35)-Mo(6)-O(33) | 97.0(4)  |
| O(15)-Mo(1)-V(1)  | 129.4(3)  | O(30)-Mo(6)-O(33) | 149.0(3) |
| O(16)-Mo(1)-V(1)  | 104.7(4)  | O(34)-Mo(6)-O(28) | 91.6(4)  |
| O(10)-Mo(1)-V(1)  | 34.6(2)   | O(35)-Mo(6)-O(28) | 163.2(4) |
| O(26)-Mo(1)-V(1)  | 117.9(3)  | O(30)-Mo(6)-O(28) | 83.9(3)  |
| O(17)-Mo(1)-V(1)  | 39.31(19) | O(33)-Mo(6)-O(28) | 71.5(3)  |
| O(18)-Mo(1)-V(1)  | 71.20(19) | O(34)-Mo(6)-O(29) | 172.5(4) |
| O(25)-Mo(2)-O(27) | 104.3(4)  | O(35)-Mo(6)-O(29) | 85.0(4)  |
| O(25)-Mo(2)-O(17) | 102.7(4)  | O(30)-Mo(6)-O(29) | 77.8(3)  |
| O(27)-Mo(2)-O(17) | 96.8(4)   | O(33)-Mo(6)-O(29) | 80.0(3)  |
| O(25)-Mo(2)-O(24) | 97.2(4)   | O(28)-Mo(6)-O(29) | 81.1(3)  |
| O(27)-Mo(2)-O(24) | 101.2(3)  | O(7)-V(1)-O(4)    | 108.1(4) |
| O(17)-Mo(2)-O(24) | 148.9(3)  | O(7)-V(1)-O(10)   | 99.0(4)  |
| O(25)-Mo(2)-O(11) | 94.1(3)   | O(4)-V(1)-O(10)   | 101.8(4) |
| O(27)-Mo(2)-O(11) | 160.4(3)  | O(7)-V(1)-O(11)   | 99.1(4)  |
| O(17)-Mo(2)-O(11) | 72.2(3)   | O(4)-V(1)-O(11)   | 93.3(3)  |
| O(24)-Mo(2)-O(11) | 82.8(3)   | O(10)-V(1)-O(11)  | 151.5(3) |
| O(25)-Mo(2)-O(19) | 167.3(3)  | O(7)-V(1)-O(17)   | 113.7(4) |
| O(27)-Mo(2)-O(19) | 86.1(3)   | O(4)-V(1)-O(17)   | 137.7(3) |
| O(17)-Mo(2)-O(19) | 83.0(3)   | O(10)-V(1)-O(17)  | 78.0(3)  |
| O(24)-Mo(2)-O(19) | 73.2(3)   | O(11)-V(1)-O(17)  | 74.6(3)  |
| O(11)-Mo(2)-O(19) | 76.7(3)   | O(7)-V(1)-Mo(1)   | 116.4(3) |
| O(23)-Mo(3)-O(29) | 103.8(4)  | O(4)-V(1)-Mo(1)   | 119.1(3) |
| O(23)-Mo(3)-O(21) | 103.3(4)  | O(10)-V(1)-Mo(1)  | 34.6(2)  |
| O(29)-Mo(3)-O(21) | 96.2(3)   | O(11)-V(1)-Mo(1)  | 117.0(2) |
| O(23)-Mo(3)-O(24) | 97.0(4)   | O(17)-V(1)-Mo(1)  | 44.4(2)  |
| O(29)-Mo(3)-O(24) | 101.0(3)  | O(8)-V(2)-O(5)    | 107.2(4) |
| O(21)-Mo(3)-O(24) | 149.3(3)  | O(8)-V(2)-O(11)   | 109.3(4) |
| O(23)-Mo(3)-O(12) | 95.2(3)   | O(5)-V(2)-O(11)   | 108.6(4) |
| O(29)-Mo(3)-O(12) | 159.9(3)  | O(8)-V(2)-O(12)   | 109.2(4) |

---

|                   |          |                  |          |
|-------------------|----------|------------------|----------|
| O(21)-Mo(3)-O(12) | 72.8(3)  | O(5)-V(2)-O(12)  | 112.3(4) |
| O(24)-Mo(3)-O(12) | 82.7(3)  | O(11)-V(2)-O(12) | 110.3(3) |
| O(23)-Mo(3)-O(19) | 167.2(3) | O(9)-V(3)-O(6)   | 107.6(4) |
| O(29)-Mo(3)-O(19) | 86.0(3)  | O(9)-V(3)-O(13)  | 101.5(4) |
| O(21)-Mo(3)-O(19) | 83.5(3)  | O(6)-V(3)-O(13)  | 101.0(4) |
| O(24)-Mo(3)-O(19) | 72.7(3)  | O(9)-V(3)-O(21)  | 106.7(4) |
| O(12)-Mo(3)-O(19) | 76.2(3)  | O(6)-V(3)-O(21)  | 144.9(4) |
| O(14)-Mo(4)-O(22) | 102.4(5) | O(13)-V(3)-O(21) | 79.3(3)  |
| O(14)-Mo(4)-O(13) | 100.4(4) | O(9)-V(3)-O(12)  | 102.0(4) |
| O(22)-Mo(4)-O(13) | 100.5(4) | O(6)-V(3)-O(12)  | 90.4(3)  |
| O(14)-Mo(4)-O(30) | 95.4(4)  | O(13)-V(3)-O(12) | 149.4(3) |
| O(22)-Mo(4)-O(30) | 101.2(4) | O(21)-V(3)-O(12) | 75.3(3)  |
| O(13)-Mo(4)-O(30) | 149.6(3) | O(9)-V(3)-Mo(4)  | 111.7(3) |
| O(14)-Mo(4)-O(20) | 170.6(4) | O(6)-V(3)-Mo(4)  | 124.4(3) |
| O(22)-Mo(4)-O(20) | 86.8(4)  | O(13)-V(3)-Mo(4) | 34.3(2)  |
| O(13)-Mo(4)-O(20) | 79.2(3)  | O(21)-V(3)-Mo(4) | 45.3(2)  |
| O(30)-Mo(4)-O(20) | 81.0(3)  | O(12)-V(3)-Mo(4) | 117.1(2) |
| O(14)-Mo(4)-O(21) | 90.8(4)  |                  |          |

**Table S3.** Selected bond lengths [Å] and angles [°] for cluster 2.

|             |            |             |           |
|-------------|------------|-------------|-----------|
| Ru(1)-O(2)  | 1.953(7)   | Mo(5)-O(28) | 1.717(10) |
| Ru(1)-O(3)  | 1.960(7)   | Mo(5)-O(27) | 1.892(9)  |
| Ru(1)-O(4)  | 2.042(6)   | Mo(5)-O(30) | 1.963(8)  |
| Mo(1)-O(23) | 1.711(8)   | Mo(5)-O(25) | 2.248(7)  |
| Mo(1)-O(22) | 1.724(8)   | Mo(5)-O(26) | 2.341(8)  |
| Mo(1)-O(9)  | 1.906(7)   | Mo(6)-O(32) | 1.702(8)  |
| Mo(1)-O(24) | 1.940(7)   | Mo(6)-O(31) | 1.706(8)  |
| Mo(1)-O(20) | 2.190(7)   | Mo(6)-O(24) | 1.884(7)  |
| Mo(1)-O(10) | 2.231(7)   | Mo(6)-O(30) | 1.940(7)  |
| Mo(1)-V(2)  | 3.1413(19) | Mo(6)-O(25) | 2.273(7)  |
| Mo(2)-O(11) | 1.712(7)   | Mo(6)-O(21) | 2.380(7)  |
| Mo(2)-O(21) | 1.733(7)   | V(1)-O(1)   | 1.605(8)  |
| Mo(2)-O(10) | 1.899(6)   | V(1)-O(2)   | 1.712(8)  |
| Mo(2)-O(12) | 1.947(7)   | V(2)-O(8)   | 1.606(8)  |
| Mo(2)-O(7)  | 2.173(6)   | V(2)-O(9)   | 1.873(7)  |
| Mo(2)-O(19) | 2.300(6)   | V(2)-O(7)   | 1.991(7)  |
| Mo(3)-O(13) | 1.713(8)   | V(2)-O(10)  | 2.010(6)  |
| Mo(3)-O(26) | 1.732(7)   | V(3)-O(5)   | 1.624(7)  |
| Mo(3)-O(14) | 1.878(8)   | V(3)-O(4)   | 1.682(6)  |
| Mo(3)-O(12) | 1.928(7)   | V(3)-O(7)   | 1.805(7)  |
| Mo(3)-O(6)  | 2.180(7)   | V(3)-O(6)   | 1.815(7)  |
| Mo(3)-O(19) | 2.323(6)   | Mo(6)-O(32) | 1.702(8)  |
| Mo(4)-O(16) | 1.720(10)  | Mo(6)-O(31) | 1.706(8)  |
| Mo(4)-O(17) | 1.730(11)  | Mo(6)-O(24) | 1.884(7)  |

---

|                   |           |                   |          |
|-------------------|-----------|-------------------|----------|
| Mo(4)-O(15)       | 1.905(8)  | Mo(6)-O(30)       | 1.940(7) |
| Mo(4)-O(27)       | 1.945(9)  | Mo(6)-O(25)       | 2.273(7) |
| Mo(4)-O(18)       | 2.205(8)  | Mo(6)-O(21)       | 2.380(7) |
| Mo(4)-O(14)       | 2.221(8)  | V(1)-O(1)         | 1.605(8) |
| Mo(5)-O(29)       | 1.704(9)  | V(1)-O(2)         | 1.712(8) |
|                   |           |                   |          |
| O(2)-Ru(1)-O(3)   | 88.7(4)   | O(17)-Mo(4)-O(14) | 166.5(5) |
| O(2)-Ru(1)-O(4)   | 90.9(3)   | O(15)-Mo(4)-O(14) | 72.6(3)  |
| O(3)-Ru(1)-O(4)   | 89.9(3)   | O(27)-Mo(4)-O(14) | 82.2(3)  |
| O(23)-Mo(1)-O(22) | 102.5(4)  | O(18)-Mo(4)-O(14) | 80.1(3)  |
| O(23)-Mo(1)-O(9)  | 101.0(4)  | O(29)-Mo(5)-O(28) | 102.5(5) |
| O(22)-Mo(1)-O(9)  | 98.5(4)   | O(29)-Mo(5)-O(27) | 99.0(4)  |
| O(23)-Mo(1)-O(24) | 101.6(4)  | O(28)-Mo(5)-O(27) | 101.7(5) |
| O(22)-Mo(1)-O(24) | 95.3(4)   | O(29)-Mo(5)-O(30) | 98.7(4)  |
| O(9)-Mo(1)-O(24)  | 150.2(3)  | O(28)-Mo(5)-O(30) | 96.2(5)  |
| O(23)-Mo(1)-O(20) | 87.9(4)   | O(27)-Mo(5)-O(30) | 151.3(3) |
| O(22)-Mo(1)-O(20) | 169.4(4)  | O(29)-Mo(5)-O(25) | 92.5(4)  |
| O(9)-Mo(1)-O(20)  | 81.5(3)   | O(28)-Mo(5)-O(25) | 162.2(5) |
| O(24)-Mo(1)-O(20) | 80.2(3)   | O(27)-Mo(5)-O(25) | 85.2(3)  |
| O(23)-Mo(1)-O(10) | 167.0(4)  | O(30)-Mo(5)-O(25) | 71.7(3)  |
| O(22)-Mo(1)-O(10) | 89.7(4)   | O(29)-Mo(5)-O(26) | 172.5(4) |
| O(9)-Mo(1)-O(10)  | 72.3(3)   | O(28)-Mo(5)-O(26) | 84.8(4)  |
| O(24)-Mo(1)-O(10) | 81.6(3)   | O(27)-Mo(5)-O(26) | 77.8(3)  |
| O(20)-Mo(1)-O(10) | 80.2(3)   | O(30)-Mo(5)-O(26) | 81.7(3)  |
| O(23)-Mo(1)-V(2)  | 131.4(3)  | O(25)-Mo(5)-O(26) | 80.5(2)  |
| O(22)-Mo(1)-V(2)  | 101.0(3)  | O(32)-Mo(6)-O(31) | 102.6(4) |
| O(9)-Mo(1)-V(2)   | 33.5(2)   | O(32)-Mo(6)-O(24) | 102.2(4) |
| O(24)-Mo(1)-V(2)  | 117.8(2)  | O(31)-Mo(6)-O(24) | 99.7(4)  |
| O(20)-Mo(1)-V(2)  | 73.08(18) | O(32)-Mo(6)-O(30) | 97.2(4)  |
| O(10)-Mo(1)-V(2)  | 39.56(16) | O(31)-Mo(6)-O(30) | 98.6(4)  |
| O(11)-Mo(2)-O(21) | 104.5(3)  | O(24)-Mo(6)-O(30) | 149.6(3) |
| O(11)-Mo(2)-O(10) | 102.6(3)  | O(32)-Mo(6)-O(25) | 161.6(4) |
| O(21)-Mo(2)-O(10) | 96.3(3)   | O(31)-Mo(6)-O(25) | 93.7(4)  |
| O(11)-Mo(2)-O(12) | 97.4(3)   | O(24)-Mo(6)-O(25) | 83.2(3)  |
| O(21)-Mo(2)-O(12) | 102.0(3)  | O(30)-Mo(6)-O(25) | 71.6(3)  |
| O(10)-Mo(2)-O(12) | 148.5(3)  | O(32)-Mo(6)-O(21) | 83.6(3)  |
| O(11)-Mo(2)-O(7)  | 93.8(3)   | O(31)-Mo(6)-O(21) | 173.8(4) |
| O(21)-Mo(2)-O(7)  | 160.7(3)  | O(24)-Mo(6)-O(21) | 78.3(3)  |
| O(10)-Mo(2)-O(7)  | 73.2(3)   | O(30)-Mo(6)-O(21) | 80.9(3)  |
| O(12)-Mo(2)-O(7)  | 81.5(3)   | O(25)-Mo(6)-O(21) | 80.2(2)  |
| O(11)-Mo(2)-O(19) | 167.4(3)  | O(1)-V(1)-O(2)    | 109.5(5) |
| O(21)-Mo(2)-O(19) | 85.3(3)   | O(8)-V(2)-O(9)    | 101.9(4) |
| O(10)-Mo(2)-O(19) | 83.8(3)   | O(8)-V(2)-O(7)    | 98.9(4)  |
| O(12)-Mo(2)-O(19) | 72.5(3)   | O(9)-V(2)-O(7)    | 150.7(3) |
| O(7)-Mo(2)-O(19)  | 77.5(2)   | O(8)-V(2)-O(10)   | 111.2(5) |

---

|                   |          |                   |           |
|-------------------|----------|-------------------|-----------|
| O(13)-Mo(3)-O(26) | 103.1(4) | O(9)-V(2)-O(10)   | 78.3(3)   |
| O(13)-Mo(3)-O(14) | 102.7(4) | O(7)-V(2)-O(10)   | 75.0(3)   |
| O(26)-Mo(3)-O(14) | 96.5(3)  | O(8)-V(2)-Mo(1)   | 116.7(4)  |
| O(13)-Mo(3)-O(12) | 97.8(4)  | O(9)-V(2)-Mo(1)   | 34.1(2)   |
| O(26)-Mo(3)-O(12) | 102.6(3) | O(7)-V(2)-Mo(1)   | 117.0(2)  |
| O(14)-Mo(3)-O(12) | 148.0(3) | O(10)-V(2)-Mo(1)  | 44.98(19) |
| O(13)-Mo(3)-O(6)  | 95.5(3)  | O(5)-V(3)-O(4)    | 105.8(4)  |
| O(26)-Mo(3)-O(6)  | 160.3(3) | O(5)-V(3)-O(7)    | 111.0(4)  |
| O(14)-Mo(3)-O(6)  | 72.9(3)  | O(4)-V(3)-O(7)    | 107.5(3)  |
| O(12)-Mo(3)-O(6)  | 80.9(3)  | O(5)-V(3)-O(6)    | 110.1(4)  |
| O(13)-Mo(3)-O(19) | 168.8(3) | O(4)-V(3)-O(6)    | 107.0(3)  |
| O(26)-Mo(3)-O(19) | 84.4(3)  | O(7)-V(3)-O(6)    | 115.0(3)  |
| O(14)-Mo(3)-O(19) | 84.5(3)  | V(1)-O(2)-Ru(1)   | 151.8(5)  |
| O(12)-Mo(3)-O(19) | 72.2(2)  | V(3)-O(4)-Ru(1)   | 121.3(4)  |
| O(6)-Mo(3)-O(19)  | 78.1(2)  | V(3)-O(6)-Mo(3)   | 118.0(3)  |
| O(16)-Mo(4)-O(17) | 102.9(6) | V(3)-O(7)-V(2)    | 129.9(3)  |
| O(16)-Mo(4)-O(15) | 98.1(4)  | V(3)-O(7)-Mo(2)   | 117.8(3)  |
| O(17)-Mo(4)-O(15) | 101.4(5) | V(2)-O(7)-Mo(2)   | 100.6(3)  |
| O(16)-Mo(4)-O(27) | 96.1(5)  | V(2)-O(9)-Mo(1)   | 112.4(3)  |
| O(17)-Mo(4)-O(27) | 99.9(5)  | Mo(2)-O(10)-V(2)  | 110.1(3)  |
| O(15)-Mo(4)-O(27) | 150.9(3) | Mo(2)-O(10)-Mo(1) | 141.0(3)  |
| O(16)-Mo(4)-O(18) | 169.9(5) | V(2)-O(10)-Mo(1)  | 95.5(3)   |
| O(17)-Mo(4)-O(18) | 87.1(4)  | Mo(3)-O(12)-Mo(2) | 119.0(3)  |
| O(15)-Mo(4)-O(18) | 81.4(3)  | Mo(3)-O(14)-Mo(4) | 140.6(4)  |
| O(27)-Mo(4)-O(18) | 80.2(3)  | Mo(2)-O(19)-Mo(3) | 92.5(2)   |
| O(16)-Mo(4)-O(14) | 90.1(4)  | Mo(2)-O(21)-Mo(6) | 143.4(4)  |

**Table S4.** Valence sums for the crystallographically independent vanadium atoms in clusters **1** and **2** obtained from crystal structure data.

| Cluster                                                                                             |                 | bond-valence sums |              |              |
|-----------------------------------------------------------------------------------------------------|-----------------|-------------------|--------------|--------------|
|                                                                                                     |                 | V(1)              | V(2)         | V(3)         |
| [Ru(dmsO) <sub>3</sub> PMo <sub>6</sub> V <sub>3</sub> O <sub>32</sub> ] <sup>6-</sup> ( <b>1</b> ) | V <sup>IV</sup> | 4.729             | 4.710        | 4.797        |
|                                                                                                     | V <sup>V</sup>  | <b>4.978</b>      | <b>4.958</b> | <b>5.050</b> |
| [Ru(PMo <sub>6</sub> V <sub>3</sub> O <sub>32</sub> ) <sub>2</sub> ] <sup>14-</sup> ( <b>2</b> )    | V <sup>IV</sup> | 4.765             | 4.808        | 4.722        |
|                                                                                                     | V <sup>V</sup>  | <b>5.016</b>      | <b>5.061</b> | <b>4.971</b> |

**Table S5.** Valence sums for the crystallographically independent molybdenum atoms in clusters **1** and **2** obtained from crystal structure data.

| Cluster                                                                                             |                  | bond-valence sums |       |       |       |       |       |
|-----------------------------------------------------------------------------------------------------|------------------|-------------------|-------|-------|-------|-------|-------|
|                                                                                                     |                  | Mo(1)             | Mo(2) | Mo(3) | Mo(4) | Mo(5) | Mo(6) |
| [Ru(dmsO) <sub>3</sub> PMo <sub>6</sub> V <sub>3</sub> O <sub>32</sub> ] <sup>6-</sup> ( <b>1</b> ) | Mo <sup>VI</sup> | 5.961             | 6.077 | 6.034 | 6.131 | 6.061 | 5.996 |
| [Ru(PMo <sub>6</sub> V <sub>3</sub> O <sub>32</sub> ) <sub>2</sub> ] <sup>14-</sup> ( <b>2</b> )    | Mo <sup>VI</sup> | 6.138             | 6.047 | 6.123 | 6.054 | 6.010 | 6.091 |
